# Supplementary material for: Sustained Improvement in the Management of Patients with Non-Small-Cell Lung Cancer (NSCLC) Harboring ALK Translocation: Where Are We Running?
Source: MDPI journal article supplement (doi:10.3390/curroncol30050384), 2023-05-16
Supplement: s1 [file s1]

**Table S1 Main features of the first-line clinical trials of ALK-Is**

| Trial        | Ref.         | Detection of ALK | Lab         | Stratification factors           |
|--------------|--------------|------------------|-------------|----------------------------------|
| PROFILE-1014 | Solomon 2014 | FISH             | Central lab | ECOG PS; BM; Ethnicity           |
| ASCEND-4     | Soria 2017   | IHC              | Central lab | ECOG PS; BM; prior CT            |
| ALEX         | Peters 2017  | IHC              | Central lab | ECOG PS; BM; Ethnicity           |
| ALTA-1L      | Camidge 2018 | FISH/IHC         | Local lab   | BM; prior CT                     |
| EXALT-3      | Horn 2021    | FISH/IHC         | Local lab*  | ECOG PS; BM; Ethnicity; prior CT |
| The Crown    | Shaw 2020    | FISH/IHC         | Local lab   | BM; Ethnicity                    |

\*after protocol amendment all cases have been detected by a central lab; abbreviations: ref.= reference; FISH = Fluorescence In Situ Hybridization; IHC= immunohistochemistry; Lab= laboratory; ECOG PS= Eastern Cooperative Oncology Group performance status; BM = brain metastases

**Table S2 patients with baseline brain metastases according the several randomized trials**

| Trial [drug]             | Pts with BM | Prior RT | % of BM+ | % all pts |
|--------------------------|-------------|----------|----------|-----------|
| PROFILE-1014[crizotinib] | 92          | 92       | 100      | 27        |
| ASCEND-4 [ceritinib]     | 121         | 50       | 41       | 13        |
| ALEX [alectinib]         | 122         | 46       | 38       | 15        |
| ALTA-1L [brigatinib]     | 96          | 37       | 39       | 13.5      |
| eXalt3 [ensartinib]      | 104         | 14       | 13.5     | 5         |
| The Crown [lorlatinib]   | 78          | 19       | 24       | 6         |

Abbreviations: Pts = patients; BM = brain metastases; RT = radiotherapy.

Solomon BJ JCO 2016(Profile 1014 all treated BM ic-DCR at 24 wks); Soria JC Lancet 2017(Ascend-4) 50 pts RT; Camidge DR JTO 2019 (Alex) 46 RT (15%); Popat S ESMO 2021 (ALTA-1L) 37 (13%) rt; Horn L Jama Onc 2021 (eXalt3) 14 PTS (5%) RT; Shaw AT NEJM 2020 (Crown) 19 RT (6%)

**Table S3 Bypass signaling pathways associated with resistance to ALK inhibitors**

| Reference                   | Drug                  | Molecular Pathway                                    | Setting                           |
|-----------------------------|-----------------------|------------------------------------------------------|-----------------------------------|
| Sasaki 2011 <sup>88</sup>   | Crizotinib            | ALK L1152R + EGFR coactivation                       | DFCI076 cell line + 3/50 pts (6%) |
| Miyawaki 2017 <sup>89</sup> | Ceritinib/alectinib   | EGFR coactivation                                    | H3122-CER cell lines              |
| Katayama 2012 <sup>71</sup> | Crizotinib            | Kit amplification + EGFR coactivation                | 18 pts: 2/18 pts KIT; 9/18 EGFR   |
| Lowly 2014 <sup>90</sup>    | Crizotinib            | IGF1R coactivation                                   | H3122 cell lines                  |
| Crystal 2014 <sup>91</sup>  | Crizotinib            | MAP2K1 mutation                                      | Cell line derived from a pt       |
| Tsuji 2019 <sup>92</sup>    | Alectinib             | c-Src and MET coactivation                           | Two pt-derived cell lines         |
| Goujl 2014 <sup>93</sup>    | Alectinib             | MET amplification                                    | Case report                       |
| Shi 2020 <sup>94</sup>      | Alectinib             | BRAFV600E + MET amplification                        | pt-derived xenograft models       |
| Yun 2019 <sup>95</sup>      | ALK-Is                | YAP oncogenes induction                              | pt-derived xenograft models       |
| Yang 2021 <sup>81</sup>     | Crizotinib/ensartinib | P53 and several pathways                             | Phase II trial of ensartinib      |
| Recondo 2020 <sup>83</sup>  | lorlatinib            | ALK compound mutations + NF2 loss function mutations | 5 pt-derived xenograft models     |

**Abbreviations:** EGFR Epidermal Growth Factor Receptor; pt(s) = patient(s); KIT = tyrosine-protein kinase; IGF1R = Insulin Growth Factor 1 Receptor; MAP2K1 = Mitogen-activated protein 2 kinase 1; c-Src = proto-

oncogene Src; MET = met proto-oncogene (MET) gene; BRAF = proto-oncogene B-Raf; YAP= Yes Associated Transcriptional Regulator; superscripted numbers indicate references cited in the text.

**Table S4 Ongoing trials of blood-assessed NGS to detect ALK+ disease**

| <b>Trial</b> | <b>Phase</b> | <b>Pt N</b> | <b>Drug</b> | <b>Class of drug</b>  | <b>Setting</b>   | <b>Aim</b>                                   | <b>Trial Identifier</b> |
|--------------|--------------|-------------|-------------|-----------------------|------------------|----------------------------------------------|-------------------------|
| LIQUIK       | Obs.         | 200         | NA          | NA                    | Naïve            | Non-inferiority of LB                        | NCT04703153             |
| LIBIL        | Obs.         | 900         | NA          | NA                    | Naive            | Identification of the genetic profile        | NCT02511288             |
| BFAST        | II/III       | 1000        | Alectinib   | 2 <sup>nd</sup> ALK-I | Naïve ALK-I      | Activity of alectinib on blood detected ALK  | NCT03178552             |
|              | II           | 35          | Brigatinib  | 2 <sup>nd</sup> ALK-I | Refractory ALK-I | Activity of brigatinib on blood detected ALK | NCT04074993             |

**Abbreviations:** NGS = next generation sequencing; Pt N= patient number; Obs. = observational; ALK-I = ALK inhibitor(s); LB = liquid biopsy

**Table S5 summary of ongoing clinical trials of ALK-Is in the early stage disease**

| <b>Trial</b>                                   | <b>Phase</b>  | <b>Pt number (stage)</b>               | <b>Drug(s)</b>                                       | <b>Principal endpoint</b> |
|------------------------------------------------|---------------|----------------------------------------|------------------------------------------------------|---------------------------|
| <b><i>Neoadjuvant</i></b>                      |               |                                        |                                                      |                           |
| NAUTIKA1 (NCT04302025)                         | II            | 80 pts (IB-IIIB, 8 <sup>th</sup> TNM)  | Alectinib x 2 cycles                                 | MPR                       |
| ALNEO                                          | II            | 33 pts (III 8 <sup>th</sup> TNM)       | Alectinib x 2 cycles                                 | MPR                       |
| NCT05380024                                    | II            | 10 pts (IIA-IIIB 8 <sup>th</sup> TNM)  | Ensartinib x2 cycles                                 | MPR                       |
| NCT05361564                                    | II            | 12 pts (I-IIIA 8 <sup>th</sup> TNM)    | Brigatinib From 4 to 10 weeks                        | Drug resistance           |
| NCT04197076                                    | Observational | 200 pts (IIB-IIIB 8 <sup>th</sup> TNM) | ALK-Is X 2-3 cycles                                  | DFS/pCR                   |
| <b><i>Adjuvant</i></b>                         |               |                                        |                                                      |                           |
| ALCHEMIST-EA4512 (NCT02201992)                 | RPIII         | 168 pts (IB-IIIA 7 <sup>th</sup> TNM)  | Crizotinib X 2 years Vs observation                  | OS                        |
| ALINA (NCT03456076)                            | RPIII         | 255 pts (IB-IIIA 7 <sup>th</sup> TNM)  | Alectinib x 2 years Vs platinum-based CTx 4 cycles   | DFS                       |
| NCT05186506                                    | RPII          | 152 pts (II-IIIA 7 <sup>th</sup> TNM)  | Ensartinib x 2 years Vs platinum-based CT x 4 cycles | DFS                       |
| NCT05341583                                    | RPIII         | 202 pts (II-IIIB 8 <sup>th</sup> TNM)  | Ensartinib x 2 years Vs placebo                      | DFS                       |
| <b><i>Unresectable III stage after CRT</i></b> |               |                                        |                                                      |                           |
| NCT05170204                                    | I-RPIII       | 320 pts Post CRT                       | Alectinib x 3 yrs Vs durvalumab x 1 year             | PFS                       |
| BOUNCE (NCT05718297)                           | RPII          | 44 pts after CRT                       | Brigatinib x 3 years Vs observation or durvalumab    | PFS                       |
| NCT05351320                                    | Ib            | 40 pts concomitant CRT                 | WX-0593 x 2 cycles plus CRT -> WX-0593 up to PD      | % G>3 pneumonitis         |

**Abbreviations:** Pt(s) = patient(s); RP = randomized phase; CRT = chemoradiotherapy; MPR = major pathological response; pCR = pathological complete response; OS = overall survival; DFS = disease-free survival; PFS = progression-free survival; G = grade
